# Supplementary material for: Co-assembly of Fmoc-tripeptide and gold nanoparticles as a facile approach to immobilize nanocatalysts
Source: Royal Society of Chemistry journal article supplement (doi:10.1039/c6ra28673a), 2017-01-01
Supplement: c6ra28673a1.pdf [file c6ra28673a1.pdf]

## Supplementary Information

### **Co-assembly of Fmoc-tripeptide and gold nanoparticles as a facile approach to immobilize nanocatalysts**

Yifei Zhang,<sup>†,a</sup> Xiaojing Liu,<sup>†,a</sup> Mengfan Wang,<sup>\*,a,b</sup> Yanan Zhao,<sup>a</sup> Wei Qi,<sup>\*,a,b,c</sup>  
Rongxin Su<sup>a,b,c</sup> and Zhimin He<sup>a</sup>

<sup>a</sup> State Key Laboratory of Chemical Engineering, School of Chemical Engineering and Technology, Tianjin University, Tianjin 300072, P. R. China

E-mail: mawang@tju.edu.cn, qiwei@tju.edu.cn

<sup>b</sup> Tianjin Key Laboratory of Membrane Science and Desalination Technology, Tianjin 300072, P. R. China

<sup>c</sup> The Co-Innovation Centre of Chemistry and Chemical Engineering of Tianjin, Tianjin 300072, P. R. China

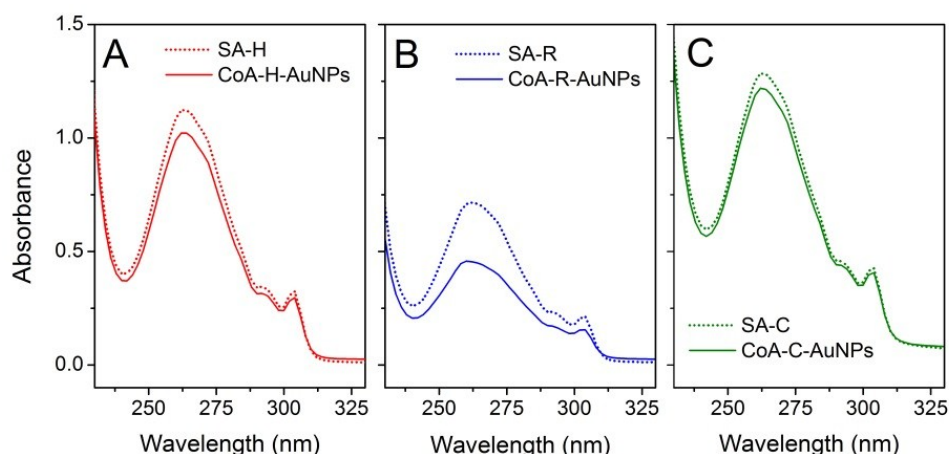

**Figure S1.** UV spectra of SA-H/CoA-H-AuNPs (A), SA-R/CoA-R-AuNPs (B) and SA-C/CoA-C-AuNPs (C) in the range of 250~310 nm

### Congo red reduction reaction

Congo red (209.0 mg) and  $\text{NaBH}_4$  (56.7 mg) were dissolved in ultrapure water (100 and 5 mL, respectively). 1000  $\mu\text{L}$  of Congo red solution, 7 mL of ultrapure water and 100  $\mu\text{L}$  of CoA-X-AuNPs were pre-heated at  $37^\circ\text{C}$  for 3 min. Then, 1 mL of fresh  $\text{NaBH}_4$  solution was added to the mixture and stirred continuously. The reaction progress was monitored through determining the concentration of Congo red on a SpectraMAX 190 spectrophotometer in the wavelength range of 200 ~ 500 nm.

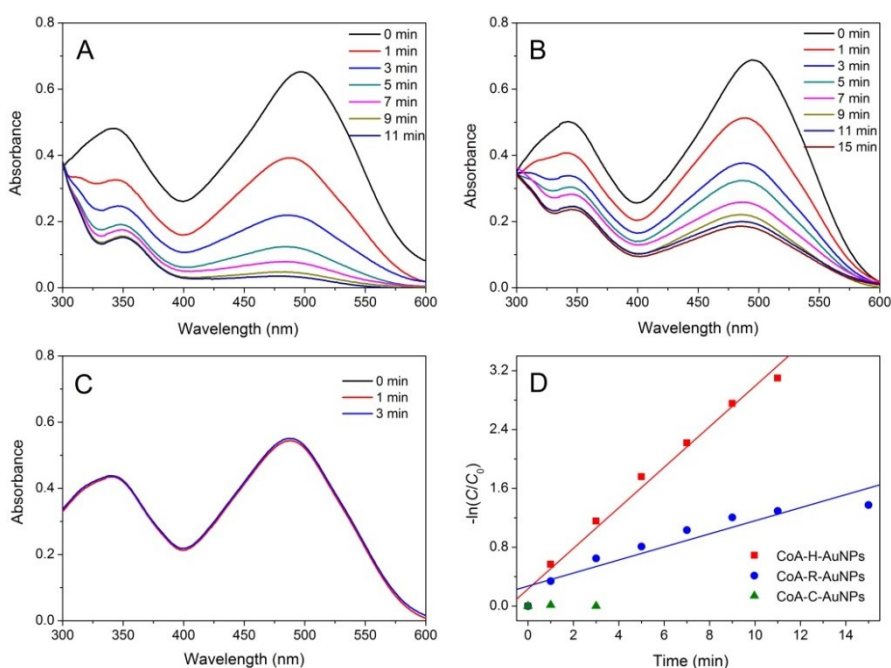

**Figure S2.** Time-dependent UV-Vis spectra for the reduction of Congo red catalyzed by CoA-H-AuNPs (A), CoA-R-AuNPs (B), and CoA-C-AuNPs (C) and their corresponding  $-\ln(C/C_0)$  vs time plots (D)

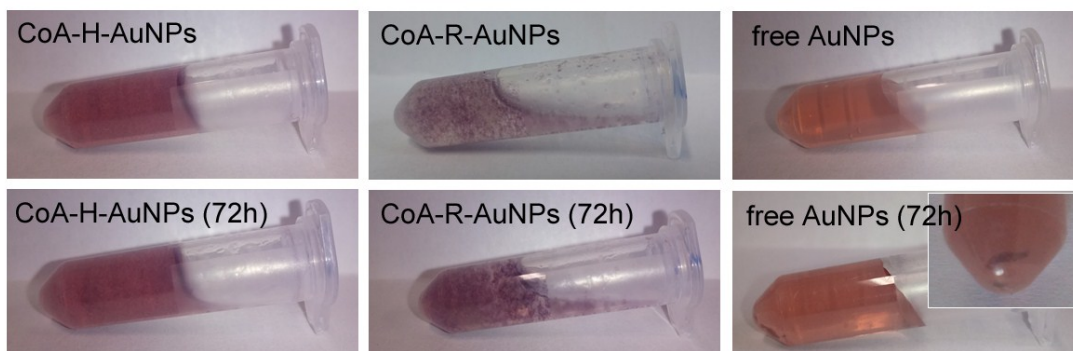

**Figure S3.** Images of CoA-H-AuNPs, CoA-R-AuNPs and free AuNPs before and after 72-h incubation
